# Supplementary material for: Comprehensive analysis of prognostic immune-related genes in the tumor microenvironment of colorectal cancer
Source: publisher site journal article supplement (doi:10.18632/aging.202479), 2021-02-01
Supplement: Supplementary file [file aging-v13i4-202479-supplementary-material-SD2.pdf]

## SUPPLEMENTARY TABLE

Supplementary Table 1. Top 20 KEEG pathways and GO terms enriched by the IRGs.

| Categories           | Term       | Description                                                   | Count | FDR      |
|----------------------|------------|---------------------------------------------------------------|-------|----------|
| <b>KEGG pathways</b> | hsa04060   | Cytokine-cytokine receptor interaction                        | 68    | 4.11E-21 |
|                      | hsa04062   | Chemokine signaling pathway                                   | 45    | 1.51E-14 |
|                      | hsa04151   | PI3K-Akt signaling pathway                                    | 42    | 0.000122 |
|                      | hsa04145   | Phagosome                                                     | 41    | 3.35E-15 |
|                      | hsa04061   | Viral protein interaction with cytokine and cytokine receptor | 40    | 3.85E-21 |
|                      | hsa05152   | Tuberculosis                                                  | 39    | 2.31E-11 |
|                      | hsa05150   | Staphylococcus aureus infection                               | 38    | 2.70E-20 |
|                      | hsa04640   | Hematopoietic cell lineage                                    | 38    | 7.47E-20 |
|                      | hsa04514   | Cell adhesion molecules (CAMs)                                | 37    | 9.65E-13 |
|                      | hsa04380   | Osteoclast differentiation                                    | 35    | 3.21E-13 |
|                      | hsa05323   | Rheumatoid arthritis                                          | 33    | 5.13E-16 |
|                      | hsa05140   | Leishmaniasis                                                 | 26    | 2.94E-12 |
|                      | hsa05322   | Systemic lupus erythematosus                                  | 26    | 1.23E-06 |
|                      | hsa05166   | Human T-cell leukemia virus 1 infection                       | 24    | 0.01797  |
|                      | hsa04610   | Complement and coagulation cascades                           | 23    | 1.06E-08 |
|                      | hsa04620   | Toll-like receptor signaling pathway                          | 23    | 5.17E-07 |
|                      | hsa05164   | Influenza A                                                   | 23    | 0.001474 |
|                      | hsa04510   | Focal adhesion                                                | 23    | 0.012233 |
|                      | hsa04015   | Rap1 signaling pathway                                        | 23    | 0.020275 |
|                      | hsa05144   | Malaria                                                       | 22    | 4.66E-13 |
| <b>GO BP</b>         | GO:0002694 | regulation of leukocyte activation                            | 100   | 2.45E-33 |
|                      | GO:0050900 | leukocyte migration                                           | 98    | 1.54E-33 |
|                      | GO:0042110 | T cell activation                                             | 86    | 3.07E-27 |
|                      | GO:0002521 | leukocyte differentiation                                     | 86    | 1.34E-24 |
|                      | GO:0001819 | positive regulation of cytokine production                    | 85    | 1.89E-26 |
|                      | GO:0042119 | neutrophil activation                                         | 85    | 3.42E-23 |
|                      | GO:0043062 | extracellular structure organization                          | 83    | 3.31E-29 |
|                      | GO:0050727 | regulation of inflammatory response                           | 82    | 1.68E-22 |
|                      | GO:0002446 | neutrophil mediated immunity                                  | 82    | 2.31E-21 |
|                      | GO:0002283 | neutrophil activation involved in immune response             | 81    | 2.31E-21 |
|                      | GO:0043312 | neutrophil degranulation                                      | 80    | 5.85E-21 |
|                      | GO:0030198 | extracellular matrix organization                             | 78    | 7.27E-30 |
|                      | GO:0051249 | regulation of lymphocyte activation                           | 77    | 3.24E-24 |
|                      | GO:0050867 | positive regulation of cell activation                        | 75    | 4.78E-29 |
|                      | GO:0032103 | positive regulation of response to external stimulus          | 73    | 7.40E-28 |
|                      | GO:0002683 | negative regulation of immune system process                  | 72    | 4.76E-18 |
|                      | GO:0007159 | leukocyte cell-cell adhesion                                  | 71    | 2.26E-25 |
|                      | GO:0002697 | regulation of immune effector process                         | 71    | 5.28E-18 |
|                      | GO:0002696 | positive regulation of leukocyte activation                   | 70    | 1.60E-26 |
|                      | GO:0022407 | regulation of cell-cell adhesion                              | 70    | 2.12E-20 |
| <b>GO CC</b>         | GO:0031012 | extracellular matrix                                          | 107   | 1.76E-41 |
|                      | GO:0098552 | side of membrane                                              | 62    | 3.05E-17 |
|                      | GO:0030667 | secretory granule membrane                                    | 60    | 3.28E-20 |
|                      | GO:0098797 | plasma membrane protein complex                               | 49    | 1.32E-06 |
|                      | GO:0009897 | external side of plasma membrane                              | 48    | 2.95E-19 |

|              |            |                                             |    |          |
|--------------|------------|---------------------------------------------|----|----------|
|              | GO:0070820 | tertiary granule                            | 40 | 2.38E-16 |
|              | GO:0005788 | endoplasmic reticulum lumen                 | 39 | 5.17E-07 |
|              | GO:0045121 | membrane raft                               | 38 | 1.69E-06 |
|              | GO:0098857 | membrane microdomain                        | 38 | 1.74E-06 |
|              | GO:0098589 | membrane region                             | 38 | 3.53E-06 |
|              | GO:0043025 | neuronal cell body                          | 38 | 0.004156 |
|              | GO:0030139 | endocytic vesicle                           | 37 | 9.93E-07 |
|              | GO:0060205 | cytoplasmic vesicle lumen                   | 37 | 2.55E-05 |
|              | GO:0031983 | vesicle lumen                               | 37 | 2.65E-05 |
|              | GO:0034774 | secretory granule lumen                     | 36 | 2.13E-05 |
|              | GO:0042581 | specific granule                            | 35 | 8.24E-13 |
|              | GO:0043235 | receptor complex                            | 35 | 7.29E-06 |
|              | GO:0031252 | cell leading edge                           | 32 | 0.009968 |
|              | GO:0005581 | collagen trimer                             | 31 | 7.80E-18 |
|              | GO:0005925 | focal adhesion                              | 31 | 0.027118 |
| <b>GO MF</b> | GO:0030545 | receptor regulator activity                 | 60 | 3.55E-12 |
|              | GO:0048018 | receptor ligand activity                    | 59 | 7.02E-13 |
|              | GO:0030246 | carbohydrate binding                        | 54 | 1.28E-18 |
|              | GO:0005539 | glycosaminoglycan binding                   | 53 | 7.93E-23 |
|              | GO:0005201 | extracellular matrix structural constituent | 52 | 5.50E-27 |
|              | GO:1901681 | sulfur compound binding                     | 44 | 6.34E-14 |
|              | GO:0008201 | heparin binding                             | 41 | 2.33E-18 |
|              | GO:0005126 | cytokine receptor binding                   | 37 | 3.10E-10 |
|              | GO:0005125 | cytokine activity                           | 35 | 7.02E-13 |
|              | GO:0008047 | enzyme activator activity                   | 35 | 0.010079 |
|              | GO:0001664 | G-protein coupled receptor binding          | 34 | 9.06E-09 |
|              | GO:0033218 | amide binding                               | 31 | 8.09E-05 |
|              | GO:0042277 | peptide binding                             | 29 | 1.07E-05 |
|              | GO:0004175 | endopeptidase activity                      | 29 | 0.008894 |
|              | GO:0003779 | actin binding                               | 29 | 0.037972 |
|              | GO:0005178 | integrin binding                            | 25 | 5.00E-09 |
|              | GO:0019955 | cytokine binding                            | 23 | 9.95E-09 |
|              | GO:0005518 | collagen binding                            | 21 | 2.15E-11 |
|              | GO:0019838 | growth factor binding                       | 21 | 6.77E-06 |
|              | GO:0031406 | carboxylic acid binding                     | 21 | 0.00145  |
